# Supplementary material for: Iridium catalysed synthesis of piperazines from diols
Source: Royal Society of Chemistry journal article supplement (doi:10.1039/b712685a), 2007-01-01

## ELECTRONIC SUPPLEMENTARY INFORMATION

### Iridium catalysed synthesis of piperazines from diols

Lars Ulrik Nordstrøm and Robert Madsen\*

*Center for Sustainable and Green Chemistry, Department of Chemistry, Building 201  
Technical University of Denmark, DK-2800 Lyngby, Denmark*

#### Table of Contents

|                                                                                           | Page |
|-------------------------------------------------------------------------------------------|------|
| General methods                                                                           | 1    |
| General procedure for <i>N</i> -heterocyclisation                                         | 2    |
| Characterization data for piperazines                                                     | 2    |
| References                                                                                | 3    |
| <sup>1</sup> H and <sup>13</sup> C NMR spectra:                                           |      |
| (±)- <i>trans</i> -Decahydroquinoxaline                                                   | 4    |
| (±)-(2 <i>S</i> ,4 <i>aR</i> ,8 <i>aR</i> )-Decahydro-2-methylquinoxaline                 | 5    |
| (±)-(2 <i>S</i> ,3 <i>S</i> ,4 <i>aR</i> ,8 <i>aR</i> )-Decahydro-2,3-dimethylquinoxaline | 6    |
| 1,4-Dibenzylpiperazine                                                                    | 7    |
| (2 <i>S</i> ,3 <i>S</i> )-2,3-Diphenylpiperazine                                          | 8    |
| (±)-2-Phenylpiperazine                                                                    | 9    |
| (±)-1,4-Dibenzyl-2-phenylpiperazine                                                       | 10   |
| (±)-1,4-Dibenzyl-2-methylpiperazine                                                       | 11   |

#### **General methods:**

[Cp\*IrCl<sub>2</sub>]<sub>2</sub> was purchased from Strem while all other chemicals were obtained from Aldrich and used as received. Toluene was distilled from sodium. NMR spectra were recorded on a Varian Mercury 300 spectrometer with residual solvent signals<sup>1</sup> or TMS as reference. Assignments were made based on one dimensional spectra as well as COSY and HSQC spectra. HRMS were obtained at the Department of Chemistry, University of Copenhagen (ionisation method: ESP+).

### General procedure for *N*-heterocyclisation:

To 5 mL screw-top vial were added [Cp\*IrCl<sub>2</sub>]<sub>2</sub> (8 mg, 10 μmol), diamine (2 mmol), diol (2 mmol), NaHCO<sub>3</sub> (10 mg, 0.12 mmol), and solvent (1 mL). The vial was flushed with argon, sealed, and heated to the indicated temperature overnight. After cooling to room temperature aqueous K<sub>2</sub>CO<sub>3</sub> and CH<sub>2</sub>Cl<sub>2</sub> were added. The phases were separated and the aqueous phase was extracted twice with CH<sub>2</sub>Cl<sub>2</sub>. The combined organic phases were dried (K<sub>2</sub>CO<sub>3</sub>) and concentrated. The residue was further purified by column chromatography (heptane/EtOAc or MeOH/CH<sub>2</sub>Cl<sub>2</sub> mixtures).

### (±)-*trans*-Decahydroquinoxaline

δ<sub>H</sub> (300 MHz, CDCl<sub>3</sub>): 2.98-2.78 (m, 4H), 2.25-2.10 (m, 2H), 1.80-1.10 (m, 10H, H1, H4, H6, H7, H8, H9); δ<sub>C</sub> (75 MHz, CDCl<sub>3</sub>): 61.4 (C5, C10), 47.1 (C2, C3), 32.1 (C6, C9), 25.0 (C7, C8); MS: *m/z* 140 [M<sup>+</sup>].

### (±)-(2*S*,4*aR*,8*aR*)-Decahydro-2-methylquinoxaline

δ<sub>H</sub> (300 MHz, CDCl<sub>3</sub>): 2.88 (dd, 1H, *J*<sub>3eq-2</sub> = 2.9 Hz, *J*<sub>3gem</sub> = 11.6 Hz, H3eq), 2.83-2.73 (ddq, 1H, *J*<sub>3eq-2</sub> = 2.9 Hz, *J*<sub>2-11</sub> = 6.3 Hz, *J*<sub>3ax-2</sub> = 10.0 Hz, H2), 2.38 (dd, 1H, *J*<sub>3ax-2</sub> = 10.2 Hz, *J*<sub>3gem</sub> = 11.6 Hz, H3ax), 2.26-2.05 (m, 2H, H5, H10), 1.75-1.55 (6H, H1, H4, H6, H9), 1.30-1.05 (m, 4H, H7, H8), 0.96 (d, 3H, *J*<sub>2-11</sub> = 6.3 Hz, H11); δ<sub>C</sub> (75 MHz, CDCl<sub>3</sub>): 61.7, 60.7 (C5, C10), 54.2, 52.2 (C2, C3), 32.2, 32.0 (C6, C9), 25.2, 25.0 (C7, C8), 20.0 (C11); HRMS calcd. for C<sub>9</sub>H<sub>19</sub>N<sub>2</sub> [M+H]<sup>+</sup> *m/z* 155.1548, found *m/z* 155.1556.

Minor isomer

δ<sub>H</sub> (300 MHz, CDCl<sub>3</sub>): 3.41 (tq, 1H, *J*<sub>2-3</sub> = 1.8 Hz, *J*<sub>2-11</sub> = 7.0 Hz, H2), 2.58-2.47 (m, 2H, H3ax, H3eq), 2.16-2.07 (m, 2H, H5, H10), 1.85-1.05 (m, 8H, H6, H7, H8, H9), 0.96 (d, 3H, *J*<sub>2-11</sub> = 6.6 Hz, H11); δ<sub>C</sub> (75 MHz, CDCl<sub>3</sub>): 62.9, 60.8, 56.5, 50.0, 32.3, 32.0, 25.1, 24.9, 18.3; MS: *m/z* 154 [M<sup>+</sup>].

### (±)-(2*R*,3*S*,4*aR*,8*aR*)-Decahydro-2,3-dimethylquinoxaline (major isomer)

δ<sub>H</sub> (300 MHz, CDCl<sub>3</sub>): 3.05, 2.88 (2×dq, 1H each, *J* = 3.6 Hz, *J* = 6.7 Hz, H2, H3), 2.44-2.15 (m, 2H, H5, H10), 1.67-1.50 (m, 6H, H1, H4, 2 × H6, 2 × H9), 1.30-1.15 (m, 4H, 2 × H7, 2 × H8), 1.08, 0.91 (2×d, 3H each, *J* = 6.7 Hz, H11, H12); δ<sub>C</sub> (75 MHz, CDCl<sub>3</sub>): 62.6, 54.4, 53.4, 52.1 (C2, C3, C5, C10), 31.2, 31.9 (C6, C9), 25.0, 24.9 (C7, C8), 19.2 (C11), 12.8 (C12); HRMS calcd. for C<sub>10</sub>H<sub>21</sub>N<sub>2</sub> [M+H]<sup>+</sup> *m/z* 169.1705, found *m/z* 169.1705.

Minor isomer

δ<sub>C</sub> (75 MHz, CDCl<sub>3</sub>): 61.3 (C5, C10), 57.9 (C2, C3), 31.7 (C6, C9), 19.0 (C11, C12).

### 1,4-Dibenzylpiperazine

δ<sub>H</sub> (300 MHz, CDCl<sub>3</sub>): 7.35-7.21 (m, 10H, Ar), 3.52 (s, 4H, Ph-CH<sub>2</sub>-N), 2.49 (bs, 8H, N-CH<sub>2</sub>-CH<sub>2</sub>-N); δ<sub>C</sub> (75 MHz, CDCl<sub>3</sub>): 138.2 (C<sub>ipso</sub>), 129.4, 128.3 (C<sub>ortho</sub>, C<sub>meta</sub>), 127.1 (C<sub>para</sub>), 63.2 (Ph-CH<sub>2</sub>-N), 53.2 (N-CH<sub>2</sub>-CH<sub>2</sub>-N); MS: *m/z* 266 [M<sup>+</sup>].

### (2*S*,3*S*)-2,3-Diphenylpiperazine

$[\alpha]_{\text{D}}^{25} = -102$  ( $c$  1.0,  $\text{CHCl}_3$ ) (lit.<sup>2</sup>  $[\alpha]_{\text{D}}^{25} = -104.6$  ( $c$  1.0,  $\text{CHCl}_3$ )); mp 93-95 °C (lit.<sup>2</sup> mp 94-96 °C);  $\delta_{\text{H}}$  (300 MHz,  $\text{CDCl}_3$ ): 7.20-7.05 (m, 10H, Ar), 3.71 (s, 2H, H<sub>2</sub>, H<sub>3</sub>), 3.14 (s, 4H, H<sub>5</sub>, H<sub>6</sub>), 2.01 (bs, 2H, H<sub>1</sub>, H<sub>4</sub>);  $\delta_{\text{C}}$  (75 MHz,  $\text{CDCl}_3$ ): 141.5 ( $\text{C}_{\text{ipso}}$ ), 128.1, 127.9, 127.3 (Ar), 68.3 (C<sub>2</sub>, C<sub>3</sub>), 47.2 (C<sub>5</sub>, C<sub>6</sub>); MS:  $m/z$  238 [ $\text{M}^+$ ]. The starting material, (1*S*,2*S*)-1,2-diamino-1,2-diphenylethane, was prepared by resolution<sup>3</sup> and showed an optical rotation of  $[\alpha]_{\text{D}}^{25} = -104$  ( $c$  1.5, MeOH) (lit.<sup>3</sup>  $[\alpha]_{\text{D}}^{23} = -106$  ( $c$  1.1, MeOH)).

#### (±)-2-Phenylpiperazine

$\delta_{\text{H}}$  (300 MHz,  $\text{CDCl}_3$ ): 7.40-7.20 (m, 5H, Ar), 3.73 (dd, 1H,  $J_{2-3\text{eq}} = 2.8$  Hz,  $J_{2-3\text{ax}} = 10.2$  Hz, H<sub>2</sub>), 3.11-2.80 (m, 5H, H<sub>3\text{eq}}</sub>, H<sub>5\text{ax}}</sub>, H<sub>5\text{eq}}</sub>, H<sub>6\text{ax}}</sub>, H<sub>6\text{eq}}</sub>), 2.69 (dd, 1H,  $J_{2-3\text{ax}} = 10.2$  Hz,  $J_{\text{gem}} = 11.9$  Hz, H<sub>3\text{ax}}</sub>), 1.80 (bs, 2H, N-H);  $\delta_{\text{C}}$  (75 MHz,  $\text{CDCl}_3$ ): 142.8 ( $\text{C}_{\text{ipso}}$ ), 128.5, 127.5, 126.9 (Ar), 62.1 (C<sub>2</sub>), 54.4, 47.9, 46.1 (C<sub>3</sub>, C<sub>4</sub>, C<sub>5</sub>); HRMS calcd. for  $\text{C}_{10}\text{H}_{15}\text{N}_2$  [ $\text{M}+\text{H}$ ]<sup>+</sup>  $m/z$  163.1235, found  $m/z$  163.0981.

#### (±)-1,4-Dibenzyl-2-phenylpiperazine

$\delta_{\text{H}}$  (300 MHz,  $\text{CDCl}_3$ ): 7.45-7.10 (m, 15H, Ar), 3.71 (d, 1H,  $J_{\text{gem}} = 13.4$  Hz, Ph- $\text{CHH}'$ -N), 3.43 (s, 2H, Ph- $\text{CH}_2$ -N), 3.36 (dd, 1H,  $J_{2-3\text{eq}} = 3.0$  Hz,  $J_{2-3\text{ax}} = 10.3$  Hz, H<sub>2</sub>), 2.85-2.67 (m, 4H, Ph- $\text{CHH}'$ -N, H<sub>3\text{eq}}</sub>, H<sub>5</sub>, H<sub>6</sub>), 2.25-2.05 (m, 3H, H<sub>3\text{ax}}</sub>, H<sub>5'</sub>, H<sub>6'</sub>);  $\delta_{\text{C}}$  (75 MHz,  $\text{CDCl}_3$ ): 142.3, 139.2, 138.0 ( $3 \times \text{C}_{\text{ipso}}$ ), 129.3, 128.9, 128.6, 128.3, 128.2, 127.5, 127.1, 126.8 (Ar), 67.4 (C<sub>2</sub>), 63.1 (N- $\text{CH}_2$ -Ph), 62.1 (C<sub>4</sub> or C<sub>5</sub>), 59.1 (N- $\text{CH}_2$ -Ph), 53.3 (C<sub>4</sub> or C<sub>5</sub>), 51.9 (C<sub>3</sub>); HRMS calcd. for  $\text{C}_{24}\text{H}_{27}\text{N}_2$  [ $\text{M}+\text{H}$ ]<sup>+</sup>  $m/z$  343.2174, found  $m/z$  343.2153.

#### (±)-1,4-Dibenzyl-2-methylpiperazine (contains a small impurity of (±)-1,4-dibenzyl-dimethylpiperazine according to mass spectrometry)

$\delta_{\text{H}}$  (300 MHz,  $\text{CDCl}_3$ ): 7.35-7.20 (m, 10H, Ar), 4.05 (d, 1H,  $J_{\text{gem}} = 13.3$  Hz, Ph- $\text{CHH}'$ -N), 3.48 (s, 2H, Ph- $\text{CH}_2$ -N), 3.19 (d, 1H,  $J_{\text{gem}} = 13.2$  Hz, Ph- $\text{CHH}'$ -N), 2.75-2.60 (m, 3H, H<sub>3\text{eq}}</sub>, H<sub>5</sub>, H<sub>6</sub>), 2.50 (dq, 1H,  $J_{2-3\text{eq}} = 3.0$  Hz,  $J_{2-\text{Me}} = 6.2$  Hz,  $J_{2-3\text{ax}} = 9.1$  Hz, H<sub>2</sub>), 2.26-2.12 (m, 2H, H<sub>5'</sub>, H<sub>6'</sub>), 2.02 (dd, 1H,  $J = 9.7$  Hz,  $J = 10.5$  Hz, H<sub>3\text{ax}}</sub>), 1.14 (d, 3H,  $J_{2-\text{Me}} = 6.2$  Hz, - $\text{CH}_3$ );  $\delta_{\text{C}}$  (75 MHz,  $\text{C}_6\text{D}_6$ ): 140.1, 139.3 ( $2 \times \text{C}_{\text{ipso}}$ ), 129.2, 129.1, 128.5, 128.4 ( $2 \times \text{C}_{\text{ortho}}$ ,  $2 \times \text{C}_{\text{meta}}$ ), 127.2, 127.0 ( $2 \times \text{C}_{\text{para}}$ ), 63.3, 61.1, 58.5, 55.7, 53.9, 51.5 ( $2 \times$  Ph- $\text{CH}_2$ -N, C<sub>2</sub>, C<sub>3</sub>, C<sub>5</sub>, C<sub>6</sub>), 16.7 (bs, - $\text{CH}_3$ ); HRMS calcd. for  $\text{C}_{19}\text{H}_{25}\text{N}_2$  [ $\text{M}+\text{H}$ ]<sup>+</sup>  $m/z$  281.2018, found  $m/z$  281.2026.

## References

- 1) H. E. Gottlieb, V. Kotlyar and A. Nudelman, *J. Org. Chem.*, 1997, **62**, 7512-7515.
- 2) P. Vairaprakash and M. Periasamy, *J. Org. Chem.*, 2006, **71**, 3636-3638.
- 3) S. Pikul and E. J. Corey, *Org. Synth.*, 1993, **71**, 22-29.

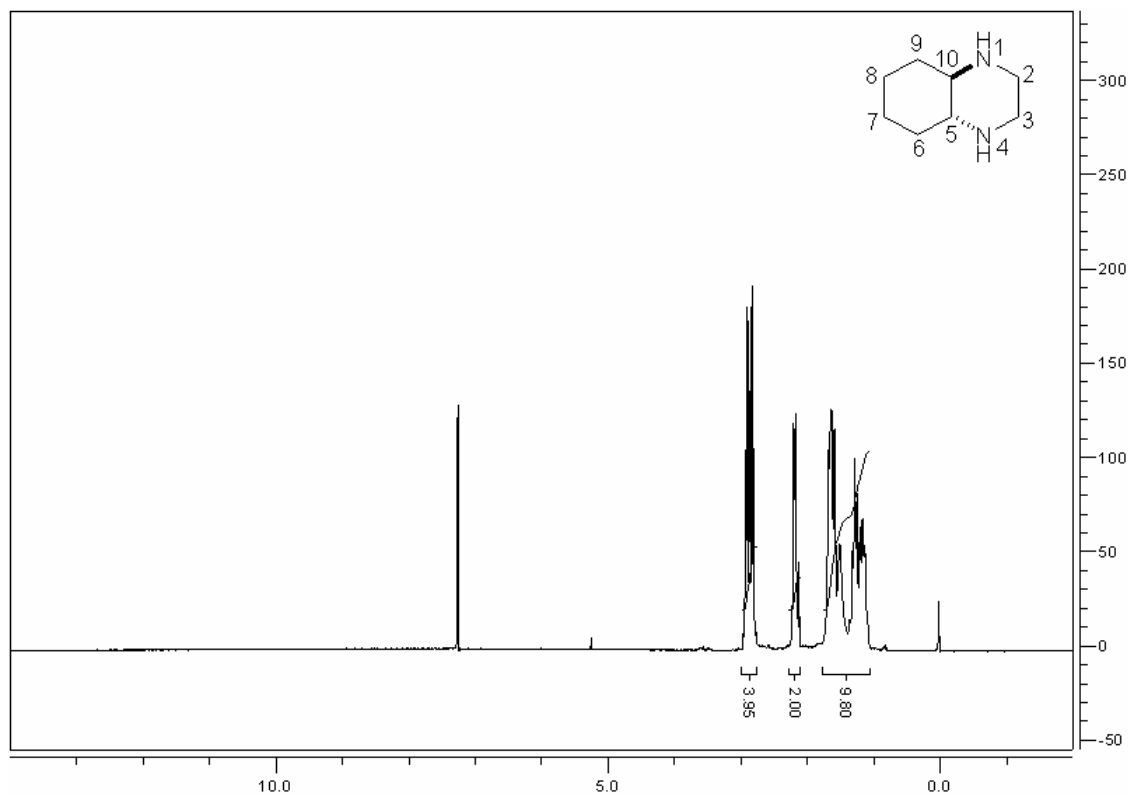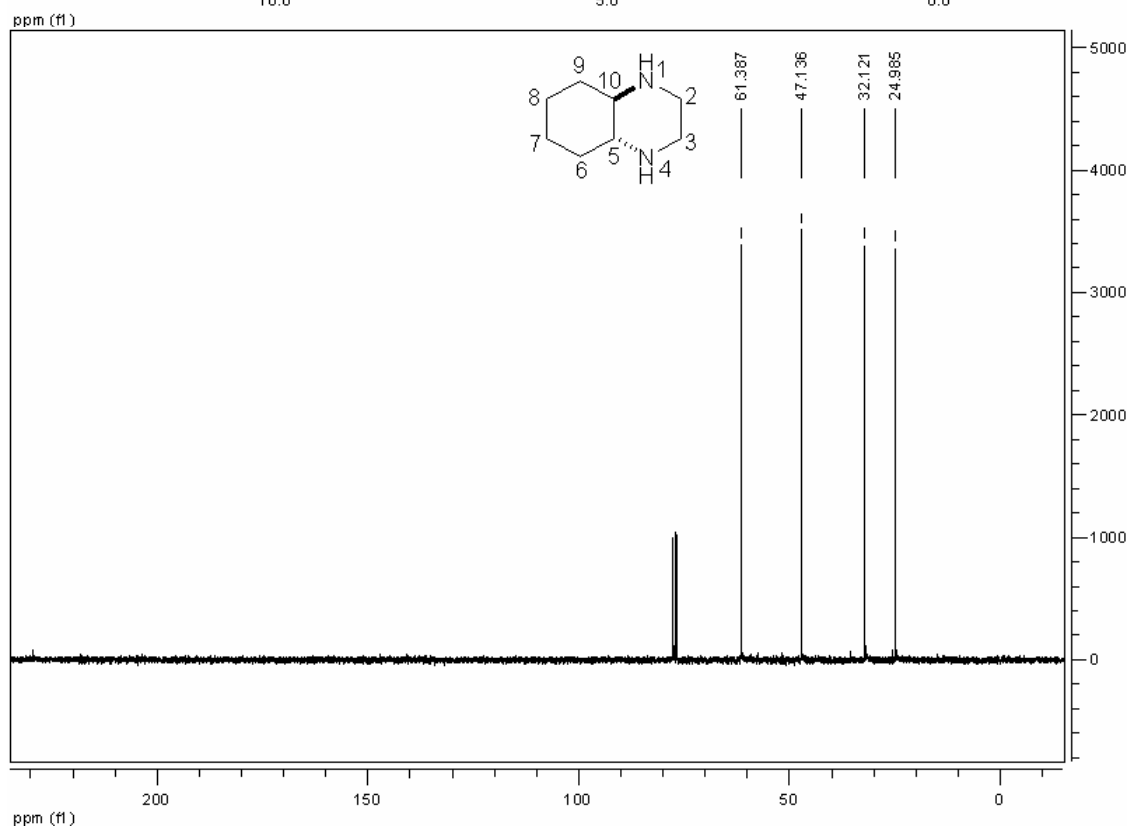

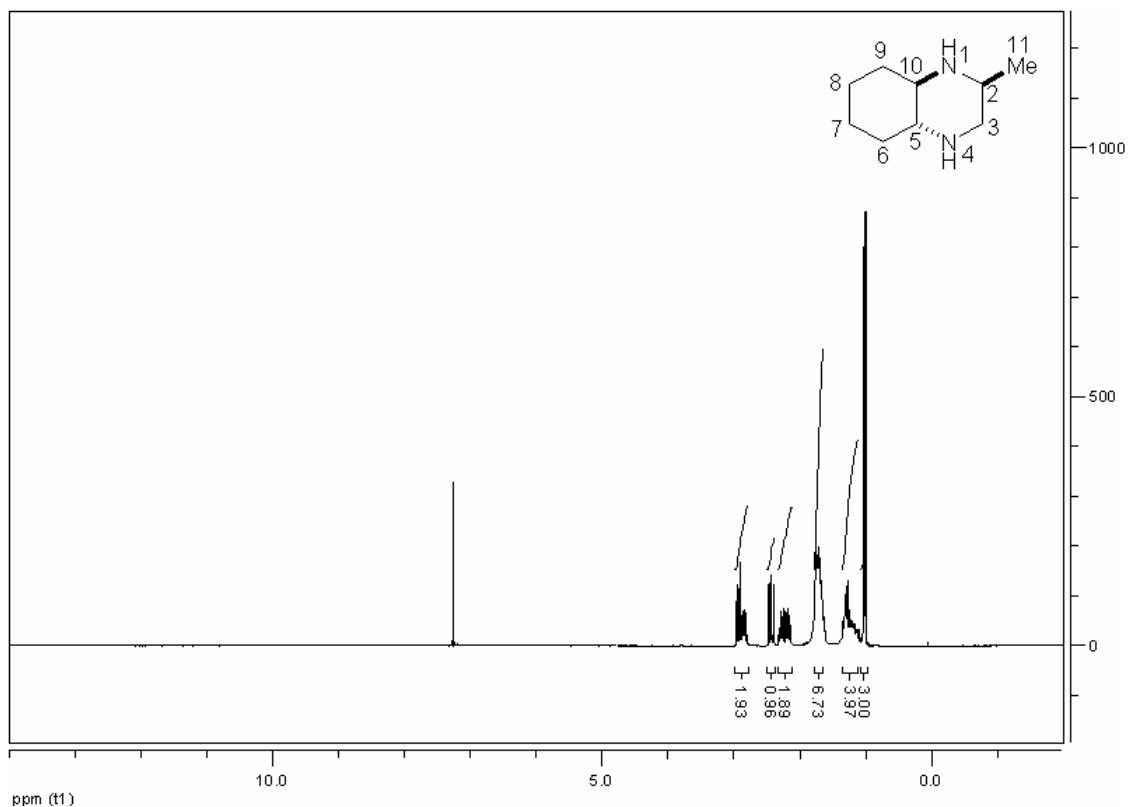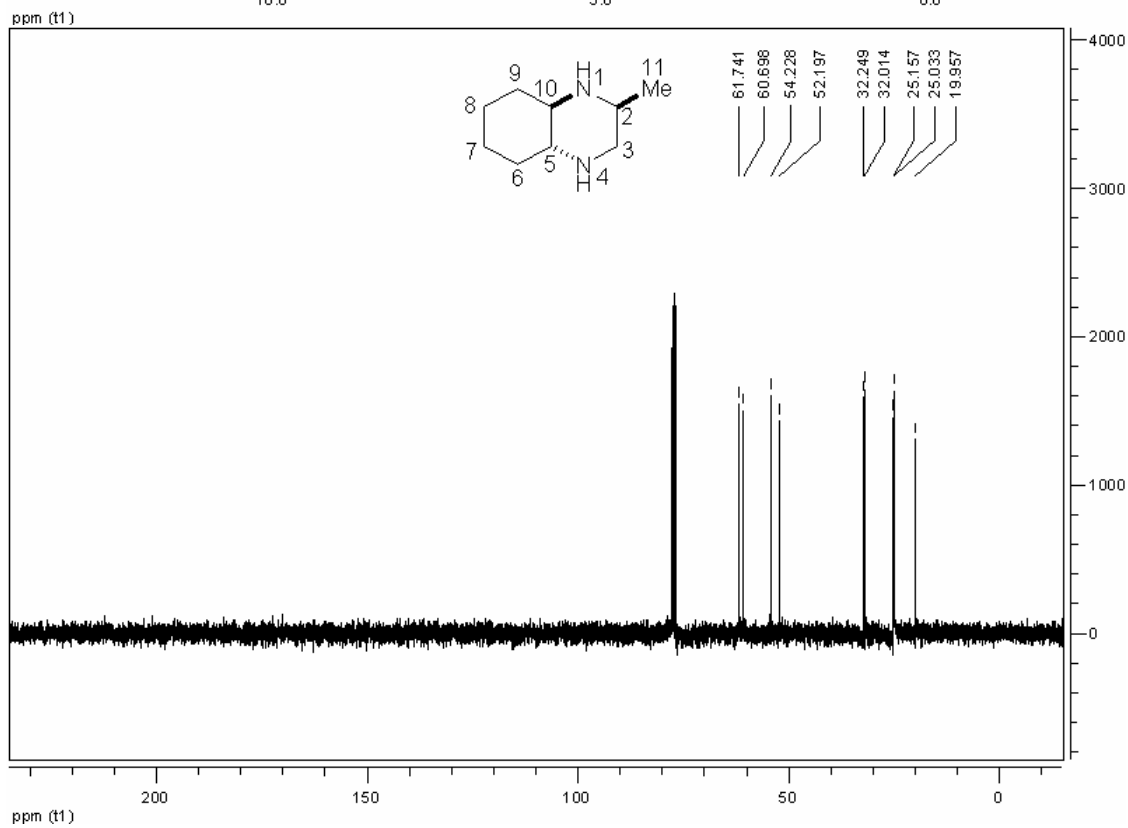



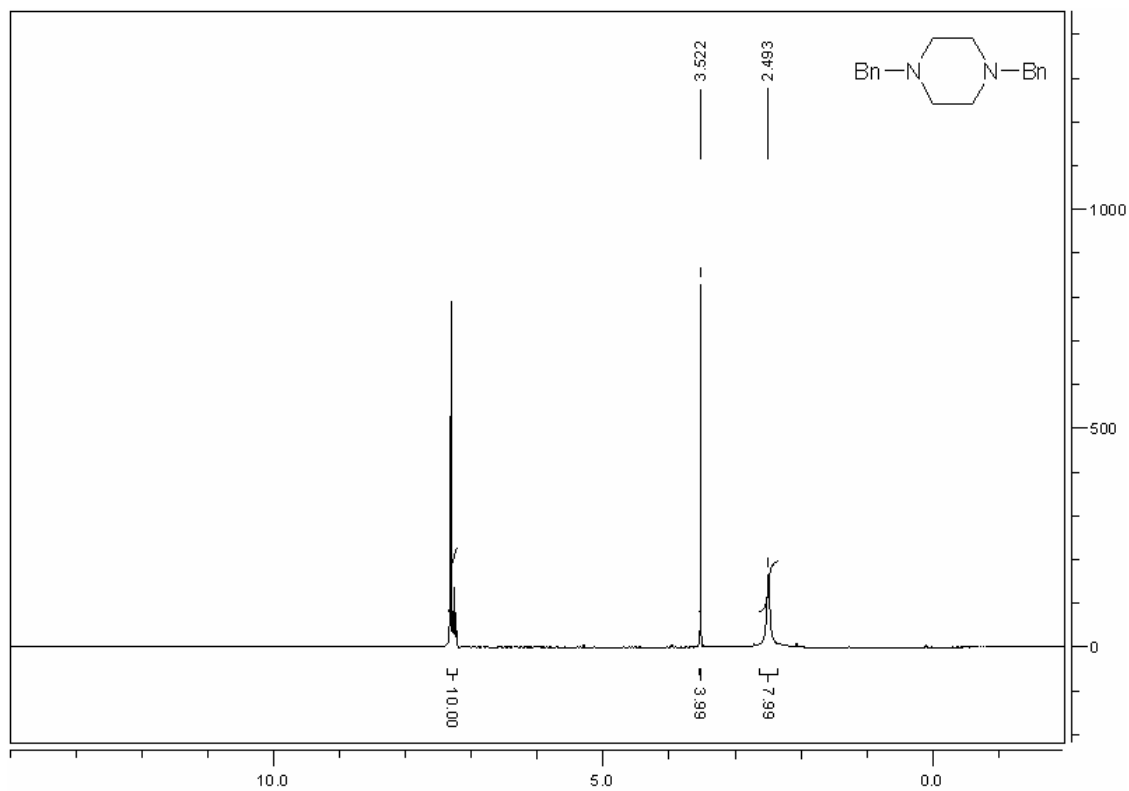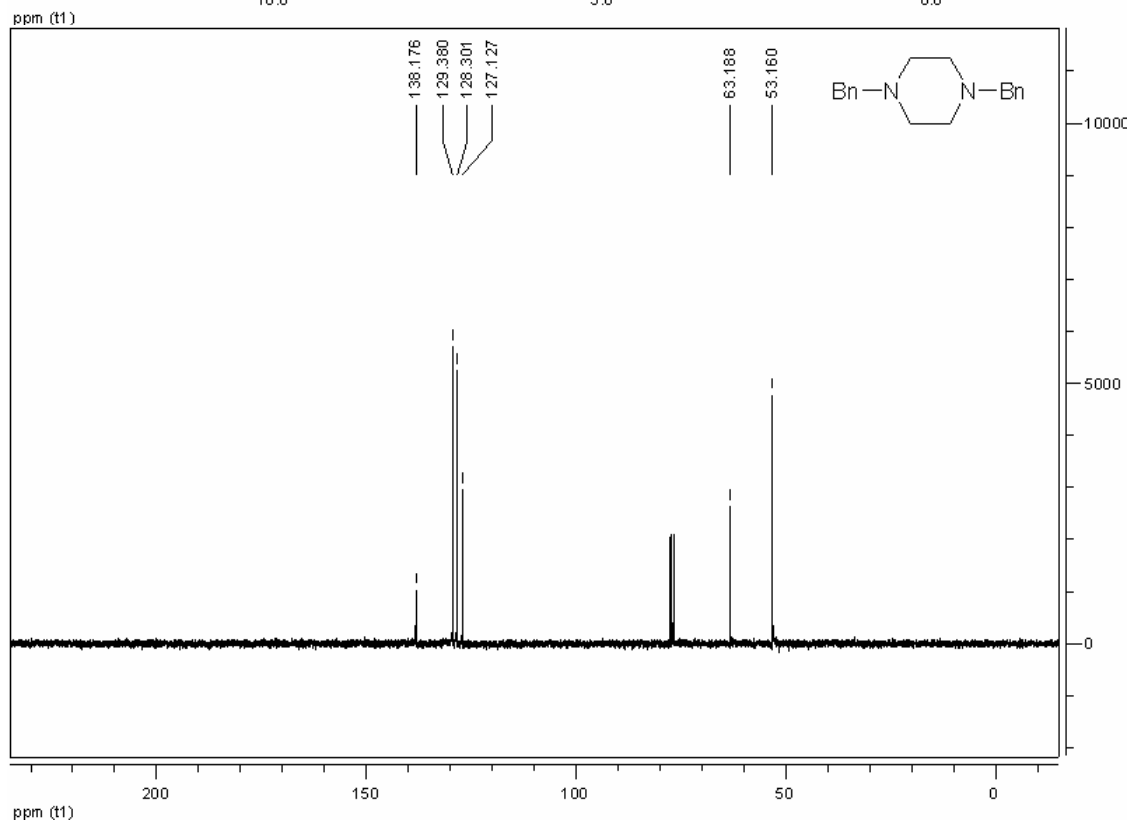

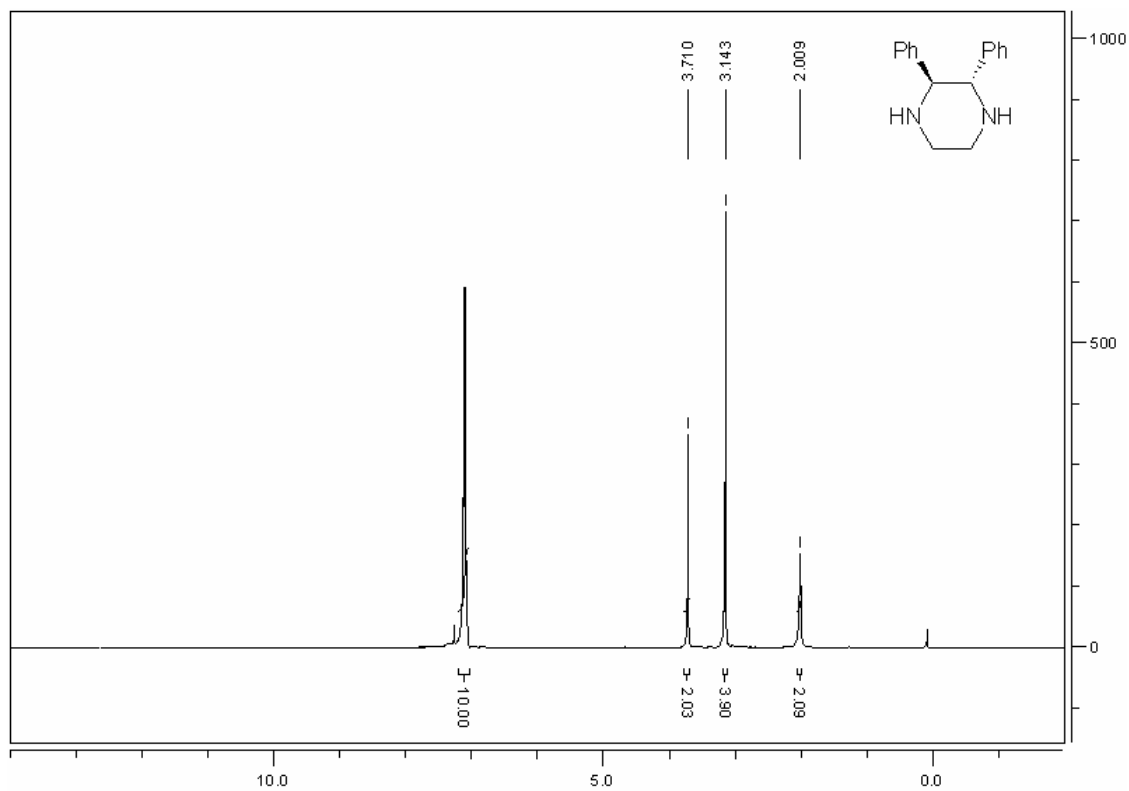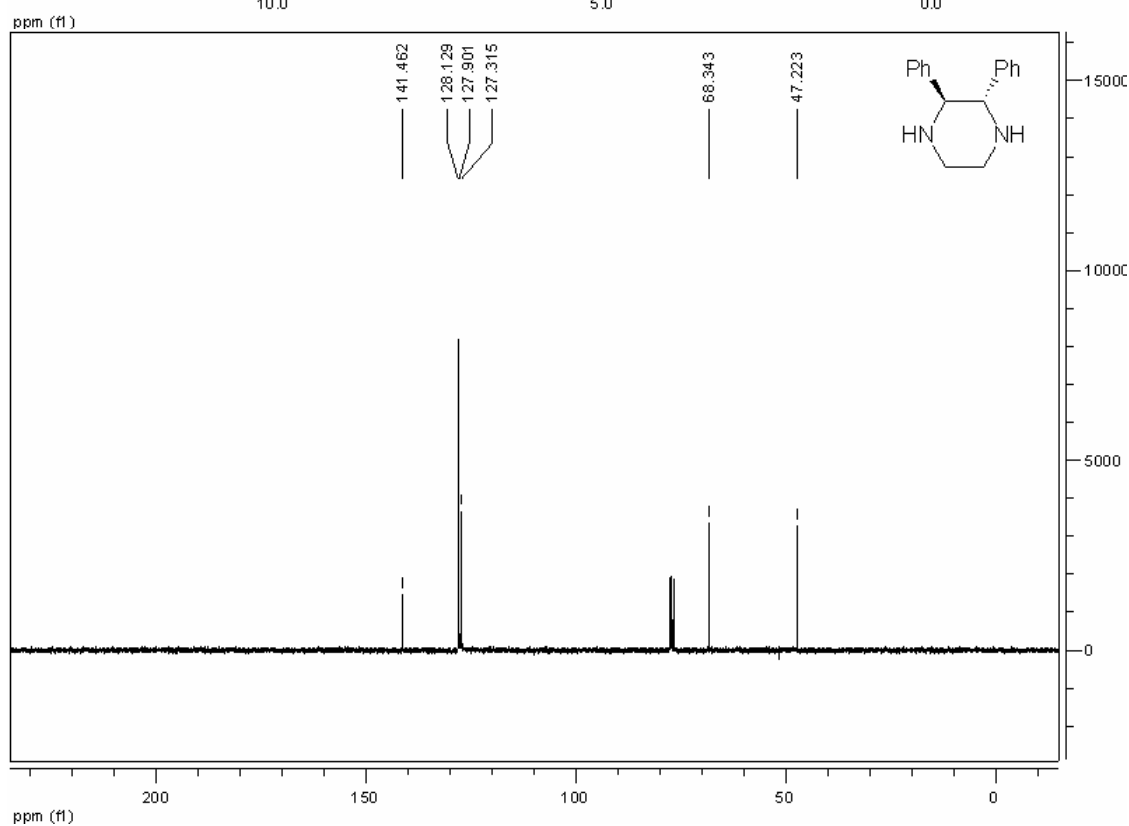

Artifact at 51 ppm



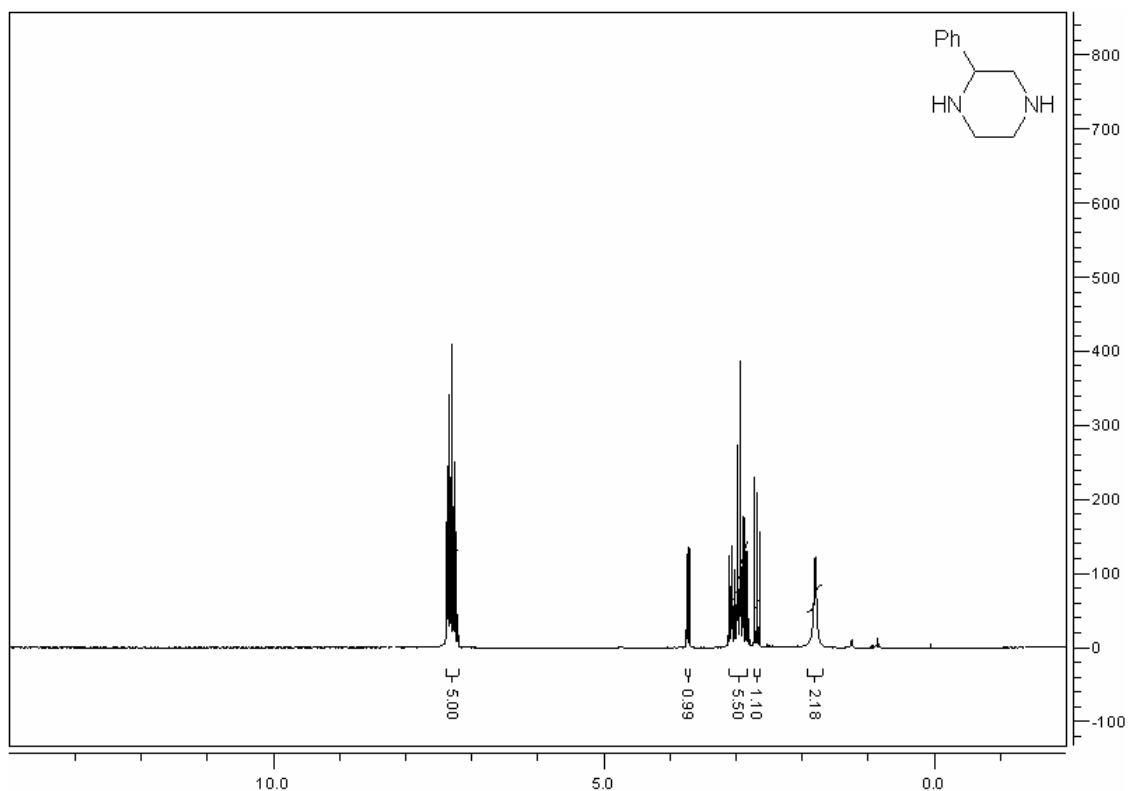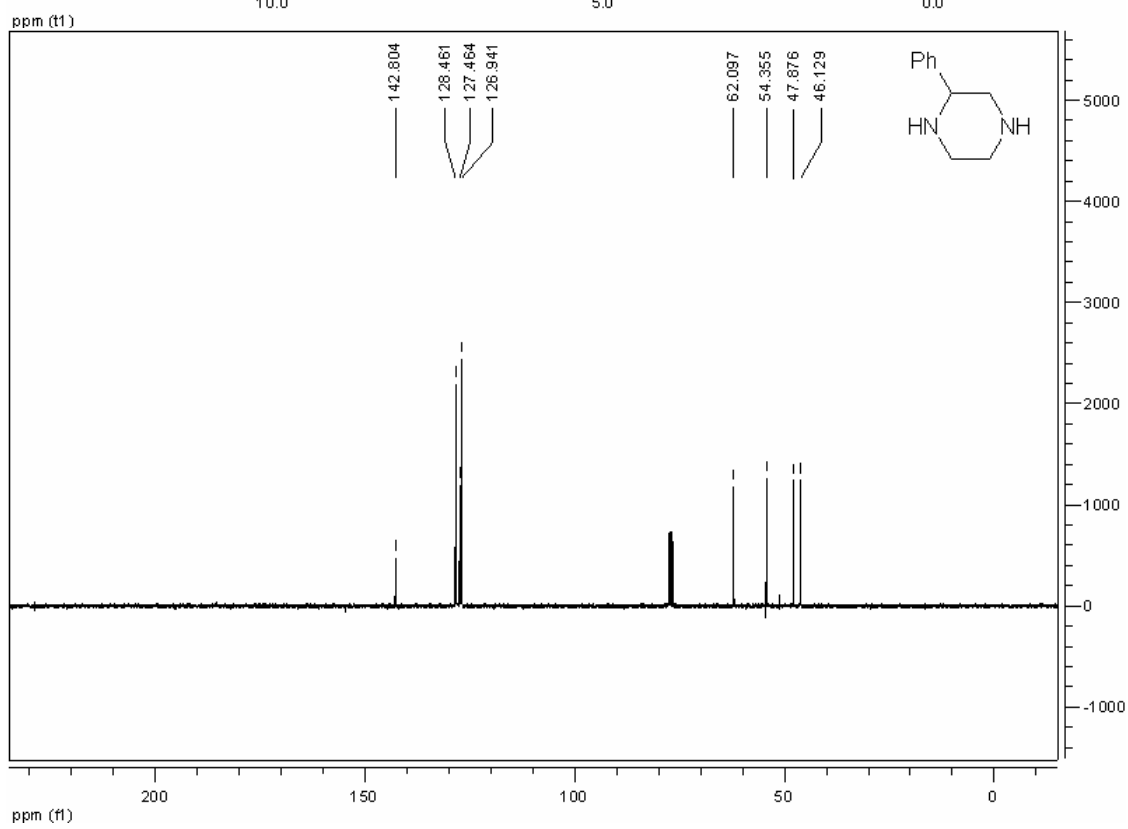

ppm (f1)  
Artifact at 51 ppm

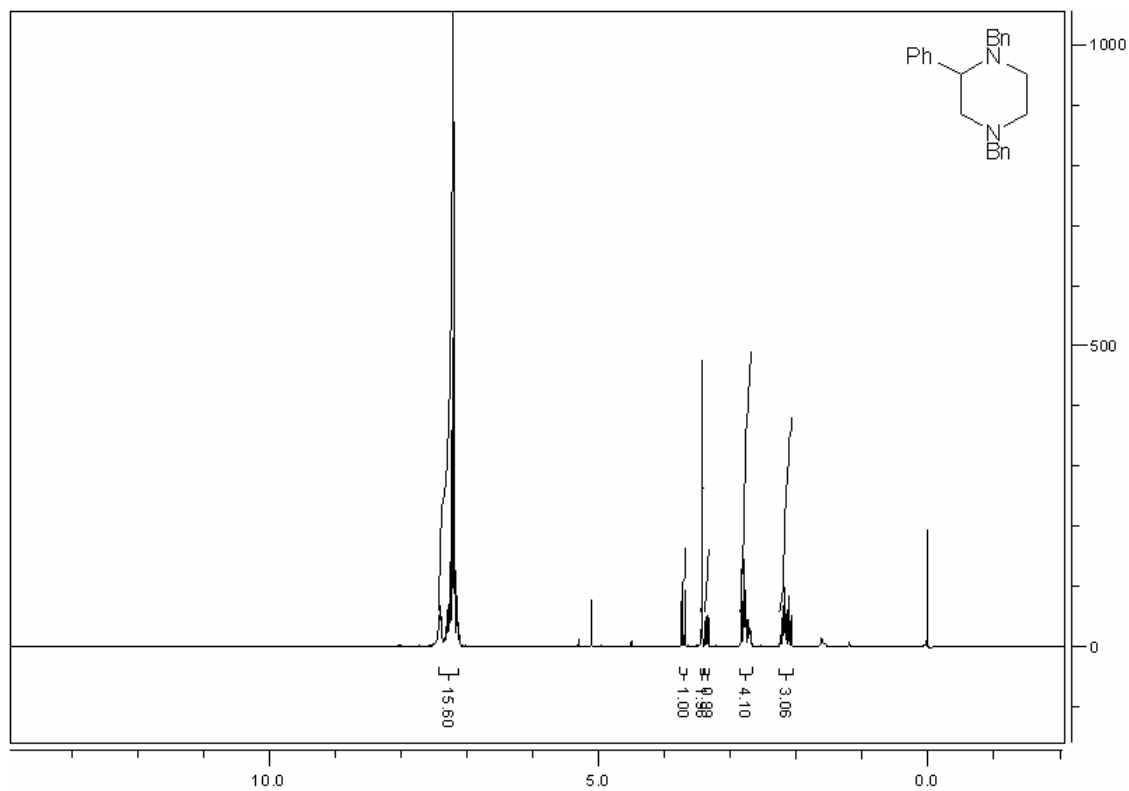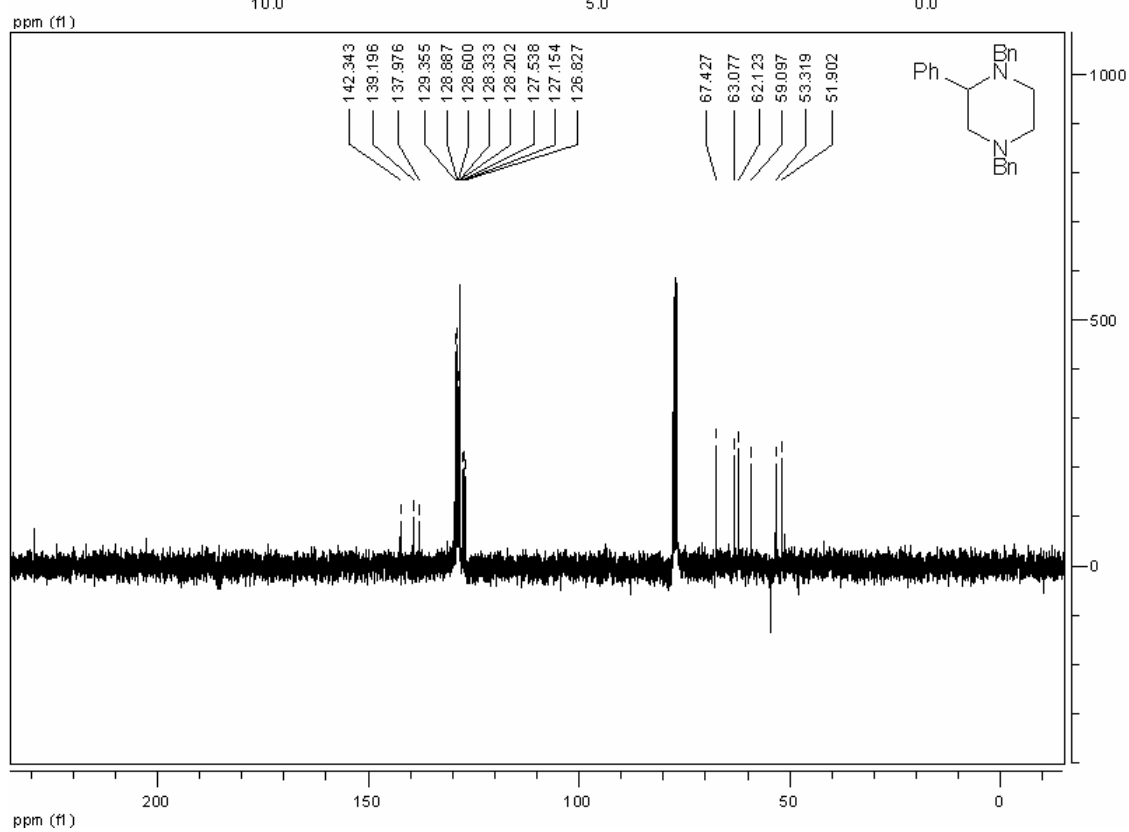

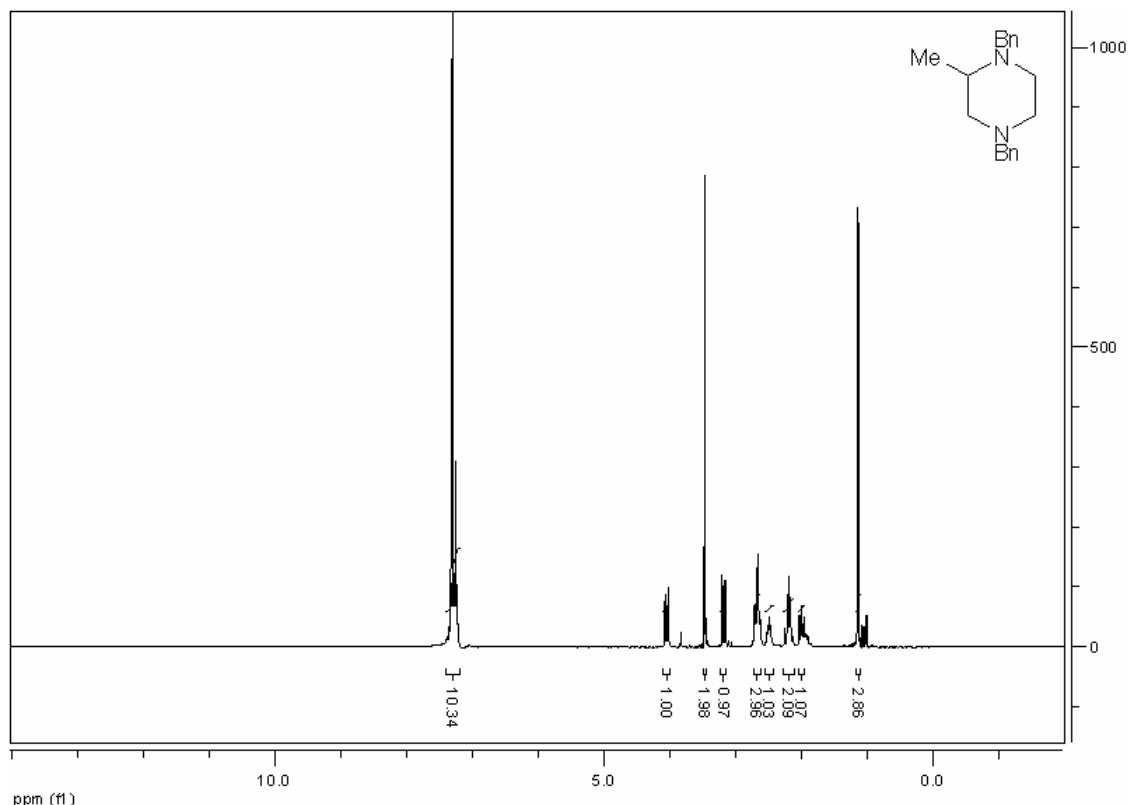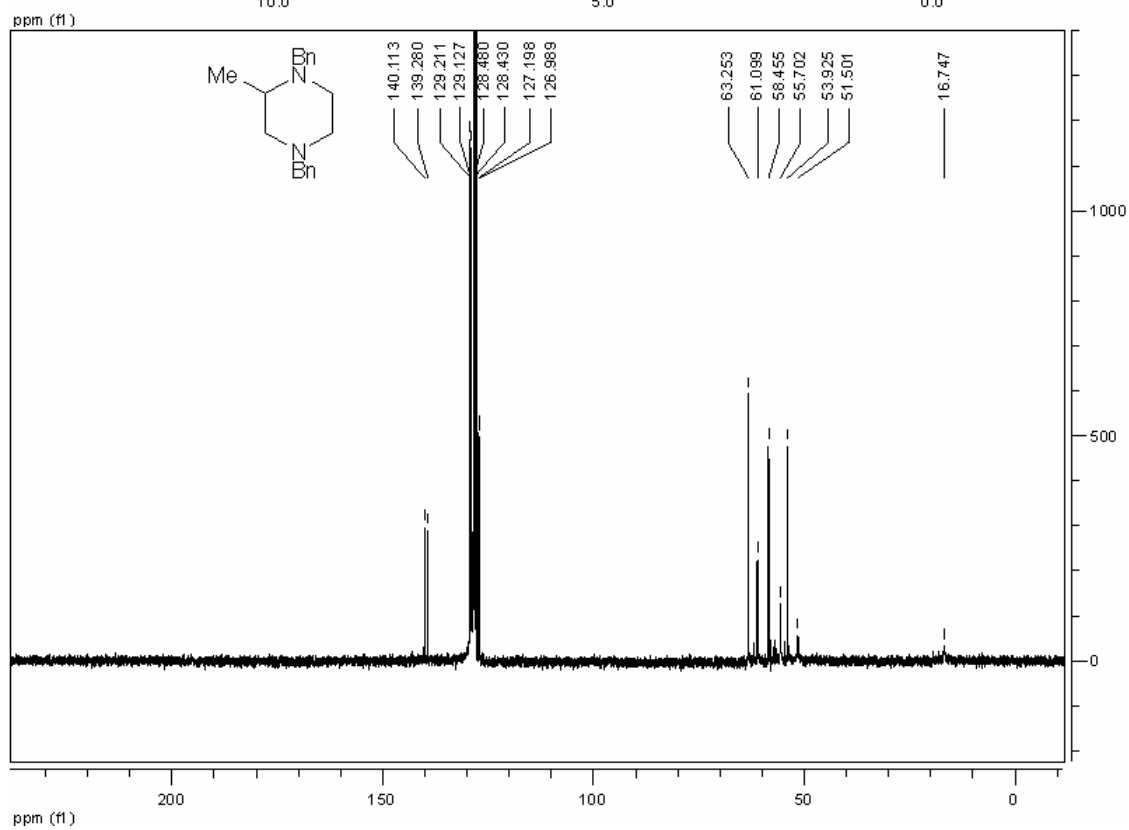

Supplement: b712685a.pdf [file b712685a.pdf]
